# Supplementary material for: Balancing Accuracy and Privacy in Federated Queries of Clinical Data Repositories: Algorithm Development and Validation
Source: PubMed Central journal article supplement (PMC7671849; doi:10.2196/18735), 2020-11-03
Supplement: jmir_v22i11e18735_app2.pdf [file jmir_v22i11e18735_app2.pdf]

# Multimedia Appendix 2

## Federated queries of clinical data repositories: balancing accuracy and privacy

Yun William Yu, PhD  
Computer and Mathematical Sciences  
University of Toronto at Scarborough  
Toronto, ON M5S 1J7  
[ywyu@math.toronto.edu](mailto:ywyu@math.toronto.edu)

Griffin M Weber, MD, PhD  
Department of Biomedical Informatics  
Harvard Medical School  
Boston, MA 02115  
[weber@hms.harvard.edu](mailto:weber@hms.harvard.edu)

Table A1. Detailed benchmark results

We measure the accuracy, wait time (in seconds), and privacy risk of running the query using raw counts, HyperLogLog sketches of various sizes, and sending full Hashed patient IDs.

Table A1a. 1 patient query

| Method     | Obfuscation | Estimated number of patients |                | Wait (s) |       | Risk: | Risk:    |
|------------|-------------|------------------------------|----------------|----------|-------|-------|----------|
|            |             | Range of Counts              | Relative Error | Mean     | Max   | Hub   | Hub+Site |
| Count      | None        | [1.000, 3.525]               | [0%, 252%]     | 0        | 0     | 1.91  | 1.91     |
|            | Mask        | [10.000, 35.25]              | [900%, 3425%]  | 0        | 0     | 0     | 0        |
|            | MPC         | [1.000, 3.525]               | [0%, 252%]     | 0.099    | 0.099 | 0     | 0        |
| HLL0       | None        | [0.694, 22.20]               | [-31%, 2120%]  | 0        | 0     | 0     | 0        |
|            | Shuffle     | [0.694, 22.20]               | [-31%, 2120%]  | 0        | 0     | 0     | 0        |
|            | Rehash      | [0.694, 22.20]               | [-31%, 2120%]  | 0        | 0     | 0     | 0        |
|            | Mask        | [0.694, 22.20]               | [-31%, 2120%]  | 0        | 0     | 0     | 0        |
|            | MPC         | [0.694, 22.20]               | [-31%, 2120%]  | 0.385    | 0.385 | 0     | 0        |
|            | Shuffle+MPC | [0.694, 22.20]               | [-31%, 2120%]  | 0.385    | 0.385 | 0     | 0        |
| HLL1       | None        | [1.386, 1.386]               | [39%, 39%]     | 0        | 0     | 0     | 0        |
|            | Shuffle     | [1.386, 1.386]               | [39%, 39%]     | 0        | 0     | 0     | 0        |
|            | Rehash      | [1.386, 1.386]               | [39%, 39%]     | 0        | 0     | 0     | 0        |
|            | Mask        | [1.386, 1.386]               | [39%, 39%]     | 0        | 0     | 0     | 0        |
|            | MPC         | [1.386, 1.386]               | [39%, 39%]     | 0.675    | 0.675 | 0     | 0        |
|            | Shuffle+MPC | [1.386, 1.386]               | [39%, 39%]     | 0.675    | 0.675 | 0     | 0        |
| HLL4       | None        | [1.033, 1.033]               | [3%, 3%]       | 0.001    | 0.001 | 0     | 0        |
|            | Shuffle     | [1.033, 1.033]               | [3%, 3%]       | 0.001    | 0.001 | 0     | 0        |
|            | Rehash      | [1.033, 1.033]               | [3%, 3%]       | 0.001    | 0.001 | 0     | 0        |
|            | Mask        | [1.033, 1.033]               | [3%, 3%]       | 0.001    | 0.001 | 0     | 0        |
|            | MPC         | [1.033, 1.033]               | [3%, 3%]       | 4.781    | 4.781 | 0     | 0        |
|            | Shuffle+MPC | [1.033, 1.033]               | [3%, 3%]       | 4.781    | 4.781 | 0     | 0        |
| HLL7       | None        | [1.004, 1.004]               | [0%, 0%]       | 0.006    | 0.006 | 0     | 0        |
|            | Shuffle     | [1.004, 1.004]               | [0%, 0%]       | 0.006    | 0.006 | 0     | 0        |
|            | Rehash      | [1.004, 1.004]               | [0%, 0%]       | 0.007    | 0.007 | 0     | 0        |
|            | Mask        | [1.004, 1.004]               | [0%, 0%]       | 0.007    | 0.007 | 0     | 0        |
|            | MPC         | [1.004, 1.004]               | [0%, 0%]       | 37.73    | 37.73 | 0     | 0        |
|            | Shuffle+MPC | [1.004, 1.004]               | [0%, 0%]       | 37.73    | 37.73 | 0     | 0        |
| HLL15      | None        | [1.000, 1.000]               | [0%, 0%]       | 1.463    | 1.463 | 0.31  | 0.31     |
|            | Shuffle     | [1.000, 1.000]               | [0%, 0%]       | 1.463    | 1.463 | 0     | 0.31     |
|            | Rehash      | [1.000, 1.000]               | [0%, 0%]       | 1.623    | 1.647 | 0     | 0.31     |
|            | Mask        | [1.000, 21.00]               | [0%, 2000%]    | 1.632    | 1.632 | 0     | 0        |
| Hashed IDs | None        | [1.000, 1.000]               | [0%, 0%]       | 0.001    | 0.001 | 1.91  | 1.91     |
|            | Rehash      | [1.000, 1.000]               | [0%, 0%]       | 0.001    | 0.001 | 0     | 1.91     |

**Table A1b.** 10 patient query.

| Method     | Obfuscation | Estimated number of patients |                | Wait (s) |       | Risk:<br>Hub | Risk:<br>Hub+Site |
|------------|-------------|------------------------------|----------------|----------|-------|--------------|-------------------|
|            |             | Range of Counts              | Relative Error | Mean     | Max   |              |                   |
| Count      | None        | [1.475, 24.00]               | [-85%, 140%]   | 0        | 0     | 15.72        | 15.72             |
|            | Mask        | [10.000, 205.2]              | [0%, 1952%]    | 0        | 0     | 0            | 0                 |
|            | MPC         | [15.47, 24.00]               | [55%, 140%]    | 0.099    | 0.099 | 0            | 0                 |
| HLL0       | None        | [2.776, 88.82]               | [-72%, 788%]   | 0        | 0     | 0            | 0                 |
|            | Shuffle     | [2.776, 88.82]               | [-72%, 788%]   | 0        | 0     | 0            | 0                 |
|            | Rehash      | [2.776, 88.82]               | [-72%, 788%]   | 0        | 0     | 0            | 0                 |
|            | Mask        | [2.776, 88.82]               | [-72%, 788%]   | 0        | 0     | 0            | 0                 |
|            | MPC         | [2.776, 88.82]               | [-72%, 788%]   | 0.385    | 0.385 | 0            | 0                 |
|            | Shuffle+MPC | [2.776, 88.82]               | [-72%, 788%]   | 0.385    | 0.385 | 0            | 0                 |
| HLL1       | None        | [3.332, 35.23]               | [-67%, 252%]   | 0        | 0     | 0            | 0                 |
|            | Shuffle     | [3.332, 35.23]               | [-67%, 252%]   | 0        | 0     | 0            | 0                 |
|            | Rehash      | [3.332, 35.23]               | [-67%, 252%]   | 0        | 0     | 0            | 0                 |
|            | Mask        | [3.332, 35.23]               | [-67%, 252%]   | 0        | 0     | 0            | 0                 |
|            | MPC         | [3.332, 35.23]               | [-67%, 252%]   | 0.675    | 0.675 | 0            | 0                 |
|            | Shuffle+MPC | [3.332, 35.23]               | [-67%, 252%]   | 0.675    | 0.675 | 0            | 0                 |
| HLL4       | None        | [5.995, 15.69]               | [-40%, 57%]    | 0.001    | 0.001 | 0            | 0                 |
|            | Shuffle     | [5.995, 15.69]               | [-40%, 57%]    | 0.001    | 0.001 | 0            | 0                 |
|            | Rehash      | [5.995, 15.69]               | [-40%, 57%]    | 0.001    | 0.001 | 0            | 0                 |
|            | Mask        | [5.995, 15.69]               | [-40%, 57%]    | 0.001    | 0.001 | 0            | 0                 |
|            | MPC         | [5.995, 15.69]               | [-40%, 57%]    | 4.778    | 4.778 | 0            | 0                 |
|            | Shuffle+MPC | [5.995, 15.69]               | [-40%, 57%]    | 4.778    | 4.778 | 0            | 0                 |
| HLL7       | None        | [8.261, 10.41]               | [-17%, 4%]     | 0.006    | 0.006 | 0.01         | 0.01              |
|            | Shuffle     | [8.261, 10.41]               | [-17%, 4%]     | 0.006    | 0.006 | 0            | 0.01              |
|            | Rehash      | [8.261, 10.41]               | [-17%, 4%]     | 0.007    | 0.007 | 0            | 0                 |
|            | Mask        | [8.261, 10.41]               | [-17%, 4%]     | 0.007    | 0.007 | 0            | 0                 |
|            | MPC         | [8.261, 10.41]               | [-17%, 4%]     | 37.72    | 37.72 | 0            | 0                 |
|            | Shuffle+MPC | [8.261, 10.41]               | [-17%, 4%]     | 37.72    | 37.72 | 0            | 0                 |
| HLL15      | None        | [10.00, 10.00]               | [0%, 0%]       | 1.477    | 1.477 | 4            | 4                 |
|            | Shuffle     | [10.00, 10.00]               | [0%, 0%]       | 1.477    | 1.477 | 0            | 4                 |
|            | Rehash      | [10.00, 10.00]               | [0%, 0%]       | 1.636    | 1.659 | 0            | 3.8               |
|            | Mask        | [10.000, 87.53]              | [0%, 775%]     | 1.578    | 1.578 | 0            | 0                 |
| Hashed IDs | None        | [10.000, 10.000]             | [0%, 0%]       | 0.002    | 0.002 | 19           | 19                |
|            | Rehash      | [10.000, 10.000]             | [0%, 0%]       | 0.002    | 0.002 | 0            | 19                |

**Table A1c.** 100 patient query.

| Method     | Obfuscation | Estimated number of patients |                | Wait (s) |       | Risk: Hub | Risk: Hub+Site |
|------------|-------------|------------------------------|----------------|----------|-------|-----------|----------------|
|            |             | Range of Counts              | Relative Error | Mean     | Max   |           |                |
| Count      | None        | [9.000, 205.6]               | [-91%, 106%]   | 0        | 0     | 59.78     | 59.78          |
|            | Mask        | [10.000, 734.1]              | [-90%, 634%]   | 0        | 0     | 0         | 0              |
|            | MPC         | [176.9, 205.6]               | [77%, 106%]    | 0.099    | 0.099 | 0         | 0              |
| HLL0       | None        | [11.10, 541.8]               | [-89%, 442%]   | 0        | 0     | 0         | 0              |
|            | Shuffle     | [11.10, 541.8]               | [-89%, 442%]   | 0        | 0     | 0         | 0              |
|            | Rehash      | [11.10, 541.8]               | [-89%, 442%]   | 0        | 0     | 0         | 0              |
|            | Mask        | [11.10, 541.8]               | [-89%, 442%]   | 0        | 0     | 0         | 0              |
|            | MPC         | [11.10, 541.8]               | [-89%, 442%]   | 0.384    | 0.384 | 0         | 0              |
|            | Shuffle+MPC | [11.10, 541.8]               | [-89%, 442%]   | 0.384    | 0.384 | 0         | 0              |
| HLL1       | None        | [19.99, 807.6]               | [-80%, 708%]   | 0        | 0     | 0         | 0              |
|            | Shuffle     | [19.99, 807.6]               | [-80%, 708%]   | 0        | 0     | 0         | 0              |
|            | Rehash      | [19.99, 807.6]               | [-80%, 708%]   | 0        | 0     | 0         | 0              |
|            | Mask        | [19.99, 807.6]               | [-80%, 708%]   | 0        | 0     | 0         | 0              |
|            | MPC         | [19.99, 807.6]               | [-80%, 708%]   | 0.676    | 0.676 | 0         | 0              |
|            | Shuffle+MPC | [19.99, 807.6]               | [-80%, 708%]   | 0.676    | 0.676 | 0         | 0              |
| HLL4       | None        | [58.08, 158.6]               | [-42%, 59%]    | 0.001    | 0.001 | 0         | 0              |
|            | Shuffle     | [58.08, 158.6]               | [-42%, 59%]    | 0.001    | 0.001 | 0         | 0              |
|            | Rehash      | [58.08, 158.6]               | [-42%, 59%]    | 0.001    | 0.001 | 0         | 0              |
|            | Mask        | [58.08, 158.6]               | [-42%, 59%]    | 0.001    | 0.001 | 0         | 0              |
|            | MPC         | [58.08, 158.6]               | [-42%, 59%]    | 4.782    | 4.782 | 0         | 0              |
|            | Shuffle+MPC | [58.08, 158.6]               | [-42%, 59%]    | 4.782    | 4.782 | 0         | 0              |
| HLL7       | None        | [87.68, 115.3]               | [-12%, 15%]    | 0.006    | 0.006 | 0.07      | 0.07           |
|            | Shuffle     | [87.68, 115.3]               | [-12%, 15%]    | 0.006    | 0.006 | 0         | 0.07           |
|            | Rehash      | [87.68, 115.3]               | [-12%, 15%]    | 0.007    | 0.007 | 0         | 0.07           |
|            | Mask        | [87.68, 118.0]               | [-12%, 18%]    | 0.007    | 0.007 | 0         | 0              |
|            | MPC         | [87.68, 115.3]               | [-12%, 15%]    | 37.65    | 37.65 | 0         | 0              |
|            | Shuffle+MPC | [87.68, 115.3]               | [-12%, 15%]    | 37.65    | 37.65 | 0         | 0              |
| HLL15      | None        | [99.15, 100.2]               | [-1%, 0%]      | 1.44     | 1.44  | 36.12     | 36.12          |
|            | Shuffle     | [99.15, 100.2]               | [-1%, 0%]      | 1.44     | 1.44  | 0         | 36.12          |
|            | Rehash      | [99.15, 100.2]               | [-1%, 0%]      | 1.6      | 1.625 | 0         | 36.12          |
|            | Mask        | [48.41, 464.9]               | [-52%, 365%]   | 1.207    | 1.207 | 0         | 0              |
| Hashed IDs | None        | [100.00, 100.00]             | [0%, 0%]       | 0.002    | 0.002 | 190.6     | 190.6          |
|            | Rehash      | [100.00, 100.00]             | [0%, 0%]       | 0.002    | 0.002 | 0         | 190.6          |

**Table A1d.** 1,000 patient query.

| Method     | Obfuscation | Estimated number of patients |                | Wait (s) |       | Risk: Hub | Risk: Hub+Site |
|------------|-------------|------------------------------|----------------|----------|-------|-----------|----------------|
|            |             | Range of Counts              | Relative Error | Mean     | Max   |           |                |
| Count      | None        | [93.47, 1,973]               | [-91%, 97%]    | 0        | 0     | 43.84     | 44             |
|            | Mask        | [93.47, 2,236]               | [-91%, 124%]   | 0        | 0     | 0         | 0              |
|            | MPC         | [1,863, 1,973]               | [86%, 97%]     | 0.099    | 0.099 | 0         | 0              |
| HLL0       | None        | [177.6, 22,737]              | [-82%, 2174%]  | 0        | 0     | 0         | 0              |
|            | Shuffle     | [177.6, 22,737]              | [-82%, 2174%]  | 0        | 0     | 0         | 0              |
|            | Rehash      | [177.6, 22,737]              | [-82%, 2174%]  | 0        | 0.001 | 0         | 0              |
|            | Mask        | [177.6, 22,737]              | [-82%, 2174%]  | 0        | 0     | 0         | 0              |
|            | MPC         | [177.6, 22,737]              | [-82%, 2174%]  | 0.385    | 0.385 | 0         | 0              |
|            | Shuffle+MPC | [177.6, 22,737]              | [-82%, 2174%]  | 0.385    | 0.385 | 0         | 0              |
| HLL1       | None        | [277.9, 5,118]               | [-72%, 412%]   | 0        | 0     | 0.04      | 0              |
|            | Shuffle     | [277.9, 5,118]               | [-72%, 412%]   | 0        | 0     | 0.03      | 0              |
|            | Rehash      | [277.9, 5,118]               | [-72%, 412%]   | 0        | 0.001 | 0         | 0.04           |
|            | Mask        | [237.9, 5,118]               | [-76%, 412%]   | 0        | 0     | 0         | 0              |
|            | MPC         | [277.9, 5,118]               | [-72%, 412%]   | 0.676    | 0.676 | 0         | 0              |
|            | Shuffle+MPC | [277.9, 5,118]               | [-72%, 412%]   | 0.676    | 0.676 | 0         | 0              |
| HLL4       | None        | [594.1, 1,498]               | [-41%, 50%]    | 0.001    | 0.001 | 0.19      | 0              |
|            | Shuffle     | [594.1, 1,498]               | [-41%, 50%]    | 0.001    | 0.001 | 0         | 0              |
|            | Rehash      | [594.1, 1,498]               | [-41%, 50%]    | 0.001    | 0.002 | 0         | 0              |
|            | Mask        | [594.1, 1,498]               | [-41%, 50%]    | 0.001    | 0.001 | 0         | 0              |
|            | MPC         | [594.1, 1,498]               | [-41%, 50%]    | 4.764    | 4.764 | 0         | 0              |
|            | Shuffle+MPC | [594.1, 1,498]               | [-41%, 50%]    | 4.764    | 4.764 | 0         | 0              |
| HLL7       | None        | [839.9, 1,180]               | [-16%, 18%]    | 0.006    | 0.006 | 1.67      | 2              |
|            | Shuffle     | [839.9, 1,180]               | [-16%, 18%]    | 0.006    | 0.006 | 0         | 2              |
|            | Rehash      | [839.9, 1,180]               | [-16%, 18%]    | 0.006    | 0.007 | 0         | 2              |
|            | Mask        | [832.6, 1,251]               | [-17%, 25%]    | 0.006    | 0.006 | 0         | 0              |
|            | MPC         | [839.9, 1,180]               | [-16%, 18%]    | 37.61    | 37.61 | 0         | 0              |
|            | Shuffle+MPC | [839.9, 1,180]               | [-16%, 18%]    | 37.61    | 37.61 | 0         | 0              |
| HLL15      | None        | [992.4, 1,008]               | [-1%, 1%]      | 1.44     | 1.44  | 375       | 375            |
|            | Shuffle     | [992.4, 1,008]               | [-1%, 1%]      | 1.44     | 1.44  | 0         | 375            |
|            | Rehash      | [992.4, 1,008]               | [-1%, 1%]      | 1.601    | 1.621 | 0         | 375            |
|            | Mask        | [93.02, 2,231]               | [-91%, 123%]   | 0.267    | 0.267 | 0         | 0              |
| Hashed IDs | None        | [1000.0, 1000.0]             | [0%, 0%]       | 0.002    | 0.002 | 1,919     | 1,919          |
|            | Rehash      | [1000.0, 1000.0]             | [0%, 0%]       | 0.002    | 0.002 | 0         | 1,919          |

**Table A1e.** 10,000 patient query.

| Method     | Obfuscation | Estimated number of patients |                | Wait (s) |       | Risk: Hub | Risk: Hub+Site |
|------------|-------------|------------------------------|----------------|----------|-------|-----------|----------------|
|            |             | Range of Counts              | Relative Error | Mean     | Max   |           |                |
| Count      | None        | [899.9, 19,470]              | [-91%, 95%]    | 0        | 0     | 2.65      | 2.65           |
|            | Mask        | [899.9, 19,477]              | [-91%, 95%]    | 0        | 0     | 0         | 0              |
|            | MPC         | [18,886, 19,470]             | [89%, 95%]     | 0.099    | 0.099 | 0         | 0              |
| HLL0       | None        | [1,421, 363,799]             | [-86%, 3538%]  | 0        | 0     | 0.23      | 0.23           |
|            | Shuffle     | [1,421, 363,799]             | [-86%, 3538%]  | 0        | 0     | 0.23      | 0.23           |
|            | Rehash      | [1,421, 363,799]             | [-86%, 3538%]  | 0.001    | 0.01  | 0         | 0.23           |
|            | Mask        | [1,421, 182,085]             | [-86%, 1721%]  | 0        | 0     | 0         | 0              |
|            | MPC         | [1,421, 363,799]             | [-86%, 3538%]  | 0.384    | 0.384 | 0         | 0              |
|            | Shuffle+MPC | [1,421, 363,799]             | [-86%, 3538%]  | 0.384    | 0.384 | 0         | 0              |
| HLL1       | None        | [2,802, 56,273]              | [-72%, 463%]   | 0        | 0     | 0.31      | 0.31           |
|            | Shuffle     | [2,802, 56,273]              | [-72%, 463%]   | 0        | 0     | 0.23      | 0.31           |
|            | Rehash      | [2,802, 56,273]              | [-72%, 463%]   | 0.001    | 0.01  | 0         | 0.31           |
|            | Mask        | [2,559, 41,028]              | [-74%, 310%]   | 0        | 0     | 0         | 0              |
|            | MPC         | [2,802, 56,273]              | [-72%, 463%]   | 0.676    | 0.676 | 0         | 0              |
|            | Shuffle+MPC | [2,802, 56,273]              | [-72%, 463%]   | 0.676    | 0.676 | 0         | 0              |
| HLL4       | None        | [6,243, 16,850]              | [-38%, 68%]    | 0.001    | 0.001 | 1.84      | 1.84           |
|            | Shuffle     | [6,243, 16,850]              | [-38%, 68%]    | 0.001    | 0.001 | 0.23      | 1.84           |
|            | Rehash      | [6,243, 16,850]              | [-38%, 68%]    | 0.002    | 0.011 | 0         | 1.84           |
|            | Mask        | [5,704, 16,369]              | [-43%, 64%]    | 0.001    | 0.001 | 0         | 0              |
|            | MPC         | [6,243, 16,850]              | [-38%, 68%]    | 4.787    | 4.787 | 0.05      | 0.05           |
|            | Shuffle+MPC | [6,243, 16,850]              | [-38%, 68%]    | 4.787    | 4.787 | 0         | 0.05           |
| HLL7       | None        | [8,310, 11,347]              | [-17%, 13%]    | 0.006    | 0.006 | 15.73     | 15.73          |
|            | Shuffle     | [8,310, 11,347]              | [-17%, 13%]    | 0.006    | 0.006 | 0.23      | 15.73          |
|            | Rehash      | [8,310, 11,347]              | [-17%, 13%]    | 0.007    | 0.016 | 0         | 15.73          |
|            | Mask        | [7,167, 14,123]              | [-28%, 41%]    | 0.005    | 0.005 | 0         | 0              |
|            | MPC         | [8,310, 11,347]              | [-17%, 13%]    | 37.83    | 37.83 | 0.3       | 0.3            |
|            | Shuffle+MPC | [8,310, 11,347]              | [-17%, 13%]    | 37.83    | 37.83 | 0         | 0.3            |
| HLL15      | None        | [9,928, 10,075]              | [-1%, 1%]      | 1.462    | 1.462 | 3,707     | 3,707          |
|            | Shuffle     | [9,928, 10,075]              | [-1%, 1%]      | 1.462    | 1.462 | 0.23      | 3,707          |
|            | Rehash      | [9,928, 10,075]              | [-1%, 1%]      | 1.625    | 1.668 | 0         | 3,707          |
|            | Mask        | [899.9, 19,477]              | [-91%, 95%]    | 0.012    | 0.012 | 0         | 0              |
| Hashed IDs | None        | [10,000, 10,000]             | [0%, 0%]       | 0.002    | 0.002 | 19,174    | 19,174         |
|            | Rehash      | [10,000, 10,000]             | [0%, 0%]       | 0.002    | 0.004 | 0         | 19,174         |

**Table A1f.** 100,000 patient query.

| Method     | Obfuscation | Estimated number of patients |                | Wait (s) |       | Risk: Hub | Risk: Hub+Site |
|------------|-------------|------------------------------|----------------|----------|-------|-----------|----------------|
|            |             | Range of Counts              | Relative Error | Mean     | Max   |           |                |
| Count      | None        | [9,057, 194,126]             | [-91%, 94%]    | 0        | 0     | 0.02      | 0.02           |
|            | Mask        | [9,057, 194,126]             | [-91%, 94%]    | 0        | 0     | 0         | 0              |
|            | MPC         | [188,850, 194,126]           | [89%, 94%]     | 0.099    | 0.099 | 0         | 0              |
| HLL0       | None        | [11,369, 727,598]            | [-89%, 628%]   | 0        | 0     | 1.32      | 1.32           |
|            | Shuffle     | [11,369, 727,598]            | [-89%, 628%]   | 0        | 0     | 1.32      | 1.32           |
|            | Rehash      | [11,369, 727,598]            | [-89%, 628%]   | 0.011    | 0.096 | 0         | 1.32           |
|            | Mask        | [11,369, 369,142]            | [-89%, 269%]   | 0        | 0     | 0         | 0              |
|            | MPC         | [11,369, 727,598]            | [-89%, 628%]   | 0.385    | 0.385 | 0         | 0              |
|            | Shuffle+MPC | [11,369, 727,598]            | [-89%, 628%]   | 0.385    | 0.385 | 0         | 0              |
| HLL1       | None        | [20,470, 393,030]            | [-80%, 293%]   | 0        | 0     | 2.71      | 2.71           |
|            | Shuffle     | [20,470, 393,030]            | [-80%, 293%]   | 0        | 0     | 1.32      | 2.71           |
|            | Rehash      | [20,470, 393,030]            | [-80%, 293%]   | 0.011    | 0.115 | 0         | 2.71           |
|            | Mask        | [20,470, 226,929]            | [-80%, 127%]   | 0        | 0     | 0         | 0              |
|            | MPC         | [20,470, 393,030]            | [-80%, 293%]   | 0.677    | 0.677 | 0         | 0              |
|            | Shuffle+MPC | [20,470, 393,030]            | [-80%, 293%]   | 0.677    | 0.677 | 0         | 0              |
| HLL4       | None        | [58,024, 169,675]            | [-42%, 70%]    | 0.001    | 0.001 | 19.51     | 20             |
|            | Shuffle     | [58,024, 169,675]            | [-42%, 70%]    | 0.001    | 0.001 | 1.32      | 19.51          |
|            | Rehash      | [58,024, 169,675]            | [-42%, 70%]    | 0.012    | 0.123 | 0         | 19.51          |
|            | Mask        | [45,325, 138,479]            | [-55%, 38%]    | 0.001    | 0.001 | 0         | 0              |
|            | MPC         | [58,024, 169,675]            | [-42%, 70%]    | 4.771    | 4.771 | 0         | 0              |
|            | Shuffle+MPC | [58,024, 169,675]            | [-42%, 70%]    | 4.771    | 4.771 | 0         | 0              |
| HLL7       | None        | [79,547, 117,654]            | [-20%, 18%]    | 0.006    | 0.006 | 158       | 158            |
|            | Shuffle     | [79,547, 117,654]            | [-20%, 18%]    | 0.006    | 0.006 | 1.32      | 158.3          |
|            | Rehash      | [79,547, 117,654]            | [-20%, 18%]    | 0.017    | 0.103 | 0         | 158            |
|            | Mask        | [15,973, 190,297]            | [-84%, 90%]    | 0.001    | 0.001 | 0         | 0              |
|            | MPC         | [79,547, 117,654]            | [-20%, 18%]    | 37.63    | 37.63 | 1.64      | 1.64           |
|            | Shuffle+MPC | [79,547, 117,654]            | [-20%, 18%]    | 37.63    | 37.63 | 0         | 1.64           |
| HLL15      | None        | [99,893, 101,691]            | [-0%, 2%]      | 1.363    | 1.363 | 36,876    | 36,876         |
|            | Shuffle     | [99,893, 101,691]            | [-0%, 2%]      | 1.363    | 1.363 | 1         | 36,876         |
|            | Rehash      | [99,893, 101,691]            | [-0%, 2%]      | 1.537    | 1.637 | 0         | 36,876         |
|            | Mask        | [9,057, 194,126]             | [-91%, 94%]    | 0.001    | 0.001 | 0         | 0              |
| Hashed IDs | None        | [100,000, 100,000]           | [0%, 0%]       | 0.008    | 0.008 | 191,759   | 191,759        |
|            | Rehash      | [100,000, 100,000]           | [0%, 0%]       | 0.011    | 0.032 | 0         | 191,759        |

**Table A1g.** 1,000,000 patient query.

| Method     | Obfuscation | Estimated number of patients |                | Wait (s) |       | Risk: Hub | Risk: Hub+Site |
|------------|-------------|------------------------------|----------------|----------|-------|-----------|----------------|
|            |             | Range of Counts              | Relative Error | Mean     | Max   |           |                |
| Count      | None        | [90,222, 1,940,247]          | [-91%, 94%]    | 0        | 0     | 0         | 0              |
|            | Mask        | [90,222, 1,940,247]          | [-91%, 94%]    | 0        | 0     | 0         | 0              |
|            | MPC         | [1,888,932, 1,940,247]       | [89%, 94%]     | 0.1      | 0.1   | 0         | 0              |
| HLL0       | None        | [181,899, 17,753,385]        | [-82%, 1675%]  | 0        | 0     | 11.71     | 11.71          |
|            | Shuffle     | [181,899, 17,753,385]        | [-82%, 1675%]  | 0        | 0     | 11.71     | 11.71          |
|            | Rehash      | [181,899, 17,753,385]        | [-82%, 1675%]  | 0.104    | 0.947 | 0         | 11.71          |
|            | Mask        | [90,950, 932,550]            | [-91%, -7%]    | 0        | 0     | 0         | 0              |
|            | MPC         | [181,899, 17,753,385]        | [-82%, 1675%]  | 0.385    | 0.385 | 0.2       | 0.2            |
|            | Shuffle+MPC | [181,899, 17,753,385]        | [-82%, 1675%]  | 0.385    | 0.385 | 0.2       | 0.2            |
| HLL1       | None        | [206,887, 11,581,296]        | [-79%, 1058%]  | 0        | 0     | 23.06     | 23.06          |
|            | Shuffle     | [206,887, 11,581,296]        | [-79%, 1058%]  | 0        | 0     | 12.15     | 23.06          |
|            | Rehash      | [206,887, 11,581,296]        | [-79%, 1058%]  | 0.105    | 0.947 | 0         | 23.06          |
|            | Mask        | [109,175, 1,273,729]         | [-89%, 27%]    | 0        | 0     | 0         | 0              |
|            | MPC         | [206,887, 11,581,296]        | [-79%, 1058%]  | 0.679    | 0.679 | 0.39      | 0.39           |
|            | Shuffle+MPC | [206,887, 11,581,296]        | [-79%, 1058%]  | 0.679    | 0.679 | 0.2       | 0.39           |
| HLL4       | None        | [538,869, 1,713,823]         | [-46%, 71%]    | 0.001    | 0.001 | 186.3     | 186.3          |
|            | Shuffle     | [538,869, 1,713,823]         | [-46%, 71%]    | 0.001    | 0.001 | 12.41     | 186.3          |
|            | Rehash      | [538,869, 1,713,823]         | [-46%, 71%]    | 0.105    | 0.943 | 0         | 186.3          |
|            | Mask        | [90,644, 1,892,176]          | [-91%, 89%]    | 0        | 0     | 0         | 0              |
|            | MPC         | [538,869, 1,713,823]         | [-46%, 71%]    | 4.754    | 4.754 | 1.91      | 1.91           |
|            | Shuffle+MPC | [538,869, 1,713,823]         | [-46%, 71%]    | 4.754    | 4.754 | 0.2       | 1.91           |
| HLL7       | None        | [837,269, 1,158,432]         | [-16%, 16%]    | 0.006    | 0.006 | 1,508     | 1,508          |
|            | Shuffle     | [837,269, 1,158,432]         | [-16%, 16%]    | 0.006    | 0.006 | 12.48     | 1,508          |
|            | Rehash      | [837,269, 1,158,432]         | [-16%, 16%]    | 0.111    | 0.955 | 0         | 1,508          |
|            | Mask        | [90,222, 1,940,247]          | [-91%, 94%]    | 0.001    | 0.001 | 0         | 0              |
|            | MPC         | [837,269, 1,158,432]         | [-16%, 16%]    | 37.39    | 37.39 | 14.71     | 14.71          |
|            | Shuffle+MPC | [837,269, 1,158,432]         | [-16%, 16%]    | 37.39    | 37.39 | 0.2       | 14.71          |
| HLL15      | None        | [987,401, 1,011,968]         | [-1%, 1%]      | 1.379    | 1.379 | 348,258   | 348,258        |
|            | Shuffle     | [987,401, 1,011,968]         | [-1%, 1%]      | 1.379    | 1.379 | 12.5      | 348,258        |
|            | Rehash      | [987,401, 1,011,968]         | [-1%, 1%]      | 1.652    | 2.537 | 0         | 348,258        |
|            | Mask        | [90,222, 1,940,247]          | [-91%, 94%]    | 0.001    | 0.001 | 0         | 0              |
| Hashed IDs | None        | [1,000,000, 1,000,000]       | [0%, 0%]       | 0.071    | 0.071 | 1,917,817 | 1,917,817      |
|            | Rehash      | [1,000,000, 1,000,000]       | [0%, 0%]       | 0.097    | 0.302 | 0         | 1,917,817      |



**Table A1h.** 10,000,000 patient query.

| Method     | Obfuscation | Estimated number of patients |                | Wait (s) |       | Risk: Hub  | Risk: Hub+Site |
|------------|-------------|------------------------------|----------------|----------|-------|------------|----------------|
|            |             | Range of Counts              | Relative Error | Mean     | Max   |            |                |
| Count      | None        | [902,793, 19,402,938]        | [-91%, 94%]    | 0        | 0     | 0          | 0              |
|            | Mask        | [902,793, 19,402,938]        | [-91%, 94%]    | 0        | 0     | 0          | 0              |
|            | MPC         | [18,884,586, 19,402,938]     | [89%, 94%]     | 0.105    | 0.105 | 0          | 0              |
| HLL0       | None        | [1,455,196, 71,013,541]      | [-85%, 610%]   | 0        | 0     | 70.06      | 70             |
|            | Shuffle     | [1,455,196, 71,013,541]      | [-85%, 610%]   | 0        | 0     | 70         | 70             |
|            | Rehash      | [1,455,196, 71,013,541]      | [-85%, 610%]   | 1.032    | 9.685 | 0          | 70             |
|            | Mask        | [734,987, 17,239,998]        | [-93%, 72%]    | 0        | 0     | 0          | 0              |
|            | MPC         | [1,455,196, 71,013,541]      | [-85%, 610%]   | 0.383    | 0.383 | 1          | 1              |
|            | Shuffle+MPC | [1,455,196, 71,013,541]      | [-85%, 610%]   | 0.383    | 0.383 | 1          | 1              |
| HLL1       | None        | [2,215,613, 41,923,242]      | [-78%, 319%]   | 0        | 0     | 140.8      | 141            |
|            | Shuffle     | [2,215,613, 41,923,242]      | [-78%, 319%]   | 0        | 0     | 92.64      | 140.8          |
|            | Rehash      | [2,215,613, 41,923,242]      | [-78%, 319%]   | 1.033    | 9.483 | 0          | 141            |
|            | Mask        | [887,447, 18,931,827]        | [-91%, 89%]    | 0        | 0     | 0          | 0              |
|            | MPC         | [2,215,613, 41,923,242]      | [-78%, 319%]   | 0.675    | 0.675 | 2          | 2              |
|            | Shuffle+MPC | [2,215,613, 41,923,242]      | [-78%, 319%]   | 0.675    | 0.675 | 1.17       | 2              |
| HLL4       | None        | [6,171,672, 16,428,565]      | [-38%, 64%]    | 0.001    | 0.001 | 1,123      | 1,123          |
|            | Shuffle     | [6,171,672, 16,428,565]      | [-38%, 64%]    | 0.001    | 0.001 | 122        | 1,123          |
|            | Rehash      | [6,171,672, 16,428,565]      | [-38%, 64%]    | 1.035    | 9.495 | 0          | 1,123          |
|            | Mask        | [902,793, 19,402,938]        | [-91%, 94%]    | 0.001    | 0.001 | 0          | 0              |
|            | MPC         | [6,171,672, 16,428,565]      | [-38%, 64%]    | 4.755    | 4.755 | 18         | 18             |
|            | Shuffle+MPC | [6,171,672, 16,428,565]      | [-38%, 64%]    | 4.755    | 4.755 | 1.18       | 18             |
| HLL7       | None        | [8,352,290, 12,307,282]      | [-16%, 23%]    | 0.006    | 0.006 | 8,947      | 8,947          |
|            | Shuffle     | [8,352,290, 12,307,282]      | [-16%, 23%]    | 0.006    | 0.006 | 126        | 8,947          |
|            | Rehash      | [8,352,290, 12,307,282]      | [-16%, 23%]    | 1.043    | 9.496 | 0          | 8,947          |
|            | Mask        | [902,793, 19,402,938]        | [-91%, 94%]    | 0.001    | 0.001 | 0          | 0              |
|            | MPC         | [8,352,290, 12,307,282]      | [-16%, 23%]    | 37.41    | 37.41 | 144        | 144            |
|            | Shuffle+MPC | [8,352,290, 12,307,282]      | [-16%, 23%]    | 37.41    | 37.41 | 1.18       | 144            |
| HLL15      | None        | [9,887,923, 10,123,720]      | [-1%, 1%]      | 1.392    | 1.392 | 2,127,583  | 2,127,583      |
|            | Shuffle     | [9,887,923, 10,123,720]      | [-1%, 1%]      | 1.392    | 1.392 | 127        | 2,127,583      |
|            | Rehash      | [9,887,923, 10,123,720]      | [-1%, 1%]      | 2.641    | 11.55 | 0          | 2,127,583      |
|            | Mask        | [902,793, 19,402,938]        | [-91%, 94%]    | 0.001    | 0.001 | 0          | 0              |
| Hashed IDs | None        | [10,000,000, 10,000,000]     | [0%, 0%]       | 0.794    | 0.794 | 19,178,114 | 19,178,114     |
|            | Rehash      | [10,000,000, 10,000,000]     | [0%, 0%]       | 1.045    | 3.09  | 0          | 19,178,114     |

**Table A1i.** 100,000,000 patient query.

| Method     | Obfuscation | Estimated number of patients |                | Wait (s) |       | Risk: Hub   | Risk: Hub+Site |
|------------|-------------|------------------------------|----------------|----------|-------|-------------|----------------|
|            |             | Range of Counts              | Relative Error | Mean     | Max   |             |                |
| Count      | None        | [9,431,902, 200,018,431]     | [-91%, 100%]   | 0        | 0     | 0           | 0              |
|            | Mask        | [9,431,902, 200,018,431]     | [-91%, 100%]   | 0        | 0     | 0           | 0              |
|            | MPC         | [199,984,637, 200,018,431]   | [100%, 100%]   | 0.171    | 0.171 | 0           | 0              |
| HLL0       | None        | [11,641,564, 818,287,824]    | [-88%, 718%]   | 0        | 0     | 99.97       | 99.97          |
|            | Shuffle     | [11,641,564, 818,287,824]    | [-88%, 718%]   | 0        | 0     | 99.97       | 99.97          |
|            | Rehash      | [11,641,564, 818,287,824]    | [-88%, 718%]   | 9.42     | 84.36 | 0           | 99.97          |
|            | Mask        | [9,431,902, 200,018,431]     | [-91%, 100%]   | 0.001    | 0.001 | 0           | 0              |
|            | MPC         | [11,641,564, 818,287,824]    | [-88%, 718%]   | 0.387    | 0.387 | 9.91        | 9.91           |
|            | Shuffle+MPC | [11,641,564, 818,287,824]    | [-88%, 718%]   | 0.387    | 0.387 | 9.91        | 9.91           |
| HLL1       | None        | [22,952,975, 448,641,535]    | [-77%, 349%]   | 0        | 0     | 199.9       | 199.9          |
|            | Shuffle     | [22,952,975, 448,641,535]    | [-77%, 349%]   | 0        | 0     | 198.5       | 199.9          |
|            | Rehash      | [22,952,975, 448,641,535]    | [-77%, 349%]   | 9.42     | 84.36 | 0           | 199.9          |
|            | Mask        | [9,431,902, 200,018,431]     | [-91%, 100%]   | 0.001    | 0.001 | 0           | 0              |
|            | MPC         | [22,952,975, 448,641,535]    | [-77%, 349%]   | 0.681    | 0.681 | 19.82       | 19.82          |
|            | Shuffle+MPC | [22,952,975, 448,641,535]    | [-77%, 349%]   | 0.681    | 0.681 | 10.75       | 19.82          |
| HLL4       | None        | [57,717,266, 167,663,627]    | [-42%, 68%]    | 0.001    | 0.001 | 1,599       | 1,599          |
|            | Shuffle     | [57,717,266, 167,663,627]    | [-42%, 68%]    | 0.001    | 0.001 | 854.1       | 1,599          |
|            | Rehash      | [57,717,266, 167,663,627]    | [-42%, 68%]    | 9.422    | 84.36 | 0           | 1,599          |
|            | Mask        | [9,431,902, 200,018,431]     | [-91%, 100%]   | 0.001    | 0.001 | 0           | 0              |
|            | MPC         | [57,717,266, 167,663,627]    | [-42%, 68%]    | 4.768    | 4.768 | 153.8       | 153.8          |
|            | Shuffle+MPC | [57,717,266, 167,663,627]    | [-42%, 68%]    | 4.768    | 4.768 | 11.69       | 153.8          |
| HLL7       | None        | [84,484,568, 117,231,365]    | [-16%, 17%]    | 0.006    | 0.006 | 12,795      | 12,795         |
|            | Shuffle     | [84,484,568, 117,231,365]    | [-16%, 17%]    | 0.006    | 0.006 | 1,199       | 12,795         |
|            | Rehash      | [84,484,568, 117,231,365]    | [-16%, 17%]    | 9.426    | 84.36 | 0           | 12,795         |
|            | Mask        | [9,431,902, 200,018,431]     | [-91%, 100%]   | 0.001    | 0.001 | 0           | 0              |
|            | MPC         | [84,484,568, 117,231,365]    | [-16%, 17%]    | 37.43    | 37.43 | 1,246       | 1,246          |
|            | Shuffle+MPC | [84,484,568, 117,231,365]    | [-16%, 17%]    | 37.43    | 37.43 | 11.83       | 1,246          |
| HLL15      | None        | [99,097,598, 101,037,154]    | [-1%, 1%]      | 1.362    | 1.362 | 3,259,256   | 3,259,256      |
|            | Shuffle     | [99,097,598, 101,037,154]    | [-1%, 1%]      | 1.362    | 1.362 | 1,265       | 3,259,256      |
|            | Rehash      | [99,097,598, 101,037,154]    | [-1%, 1%]      | 10.96    | 85.89 | 0           | 3,259,256      |
|            | Mask        | [9,431,902, 200,018,431]     | [-91%, 100%]   | 0.001    | 0.001 | 0           | 0              |
| Hashed IDs | None        | [100,000,000, 100,000,000]   | [0%, 0%]       | 10.12    | 10.12 | 199,999,801 | 199,999,801    |
|            | Rehash      | [100,000,000, 100,000,000]   | [0%, 0%]       | 11.56    | 23.31 | 0           | 199,999,801    |
