# Supplementary material for: Balancing Accuracy and Privacy in Federated Queries of Clinical Data Repositories: Algorithm Development and Validation
Source: PubMed Central journal article supplement (PMC7671849; doi:10.2196/18735), 2020-11-03
Supplement: jmir_v22i11e18735_app3.pdf [file jmir_v22i11e18735_app3.pdf]

# Multimedia Appendix 3

## Federated queries of clinical data repositories: balancing accuracy and privacy

Yun William Yu, PhD  
Computer and Mathematical Sciences  
University of Toronto at Scarborough  
Toronto, ON M5S 1J7  
[ywyu@math.toronto.edu](mailto:ywyu@math.toronto.edu)

Griffin M Weber, MD, PhD  
Department of Biomedical Informatics  
Harvard Medical School  
Boston, MA 02115  
[weber@hms.harvard.edu](mailto:weber@hms.harvard.edu)

Table A2. Time and space complexity for various methods

Theoretical upper bounds and actual added compute time when using a particular method + obfuscation. Also shown is the space-complexity (both theoretical and empirical) of the amount of data that the hospitals and hub have to send over the network. Note that actual times given are based on assuming that the hospitals run their local computations in parallel. Further, note that while we have only given asymptotic theoretical time-complexities in big-O notation, the theoretical communication complexity (Transfer Time – Bytes) is an exact number based on the parameters. In the table,  $n$ =number of hospitals,  $m$ =patients per hospital, and  $t$ =number of HLL buckets.

| Algorithm |             | Added time complexity |           |         | Actual additional time (s)   |                              | Actual time examples (s) |               | Transfer time (theoretical) |                  | Actual data   |
|-----------|-------------|-----------------------|-----------|---------|------------------------------|------------------------------|--------------------------|---------------|-----------------------------|------------------|---------------|
| Method    | Obfuscation | Sketch                | Obfuscate | Hub     | Site                         | Hub                          | 1 Patient                | 100M Patients | Rounds                      | Bytes            | 100M Patients |
| Count     |             |                       |           | $O(n)$  |                              | $10^{-7}n$                   | 0.000                    | 0.000         | 1                           | $4n$             | 400 bytes     |
| Count     | Mask        |                       | $O(1)$    | $O(n)$  | $10^{-7}$                    | $10^{-7}n$                   | 0.000                    | 0.000         | 1                           | $4n$             | 400 bytes     |
| Count     | MPC         |                       | $O(1)$    | $O(n)$  | 0.049                        | $0.05 + 0.006n$              | 0.100                    | 0.100         | 3                           | $896n$           | 87.5 KiB      |
| HLL       |             | $O(t)$                |           | $O(nt)$ |                              | $5 \times 10^{-9} \cdot nt$  | 0.006                    | 0.005         | 1                           | $nt$             | 12800 bytes   |
| HLL       | Mask        | $O(t)$                | $O(t)$    | $O(nt)$ | $10^{-7} \cdot t$            | $5 \times 10^{-9} \cdot nt$  | 0.007                    | 0.001         | 1                           | $nt$             | 12800 bytes   |
| HLL       | Shuffle     | $O(t)$                | $O(t)$    | $O(nt)$ | $10^{-7} \cdot t$            | $5 \times 10^{-9} \cdot nt$  | 0.006                    | 0.005         | 1                           | $nt$             | 12800 bytes   |
| HLL       | Rehash      | $O(t)$                | $O(m)$    | $O(nt)$ | $6.5 \times 10^{-6} \cdot m$ | $5 \times 10^{-9} \cdot nt$  | 0.007                    | 8.757         | 1                           | $nt$             | 12800 bytes   |
| HLL       | MPC         | $O(t)$                | $O(t)$    | $O(nt)$ | $0.05t$                      | $0.00235nt + 0.197t + 0.027$ | 40.930                   | 41.010        | 3                           | $256n + 20480nt$ | 250 MiB       |
| HLL       | Shuffle+MPC | $O(t)$                | $O(t)$    | $O(nt)$ | $0.05t$                      | $0.00235nt + 0.197t + 0.027$ | 40.930                   | 41.010        | 3                           | $256n + 20480nt$ | 250 MiB       |
| HashedIDs |             |                       |           | $O(mn)$ |                              | $10^{-7} \cdot mn$           | 0.003                    | 12.670        | 1                           | $4m$             | 8 MB          |
| HashedIDs | Rehash      |                       | $O(m)$    | $O(mn)$ | $6.5 \times 10^{-6} \cdot m$ | $10^{-7} \cdot mn$           | 0.003                    | 14.350        | 1                           | $4m$             | 8 MB          |
